# Supplementary material
Source: PubMed Central journal article supplement (PMC4596913)
Supplement: mmc1.pdf [file mmc1.pdf]

The American Journal of Human Genetics

Supplemental Data

## **Loss-of-Function Mutations in the WNT Co-receptor**

### ***LRP6* Cause Autosomal-Dominant Oligodontia**

**Maarten P.G. Massink, Marijn A. Créton, Francesca Spanevello, Willem M.M. Fennis,  
Marco S. Cune, Sanne M.C. Savelberg, Isaïc Nijman, Madelon M. Maurice, Marie-José  
van den Boogaard, and Gijs van Haften**

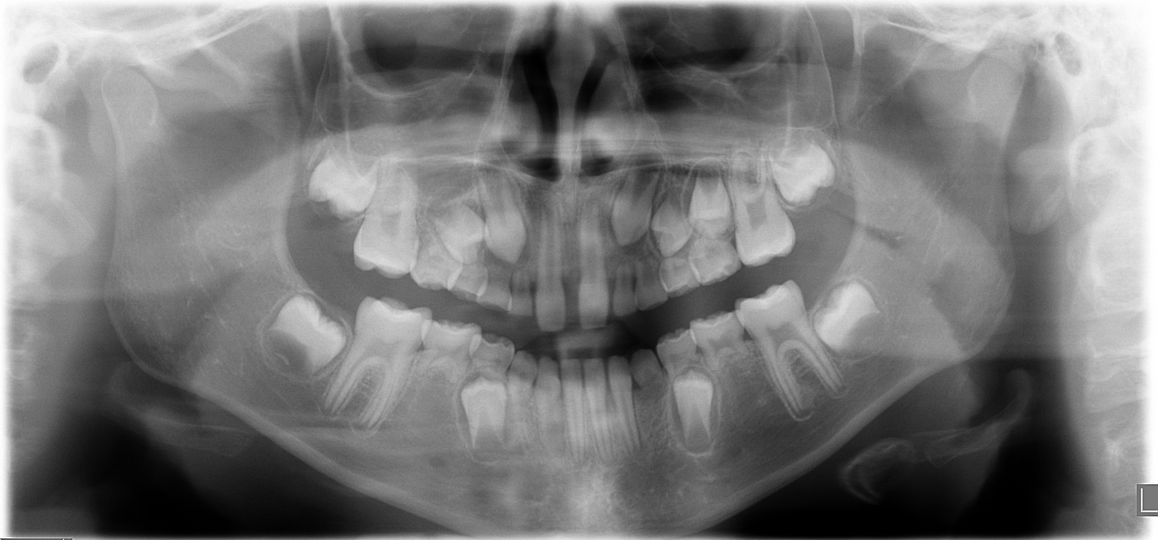

**Figure S1.** Panoramic radiograph of subject F1-III-2 showing taurodontism of the first molars in the upper jaw. The following teeth are agenetic: 18, 15, 12, 22, 28, 38, 35, 33, 43, 45 and 48.

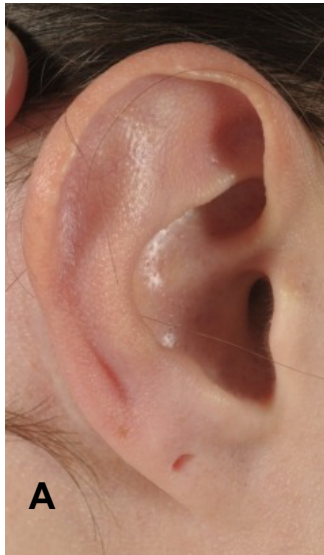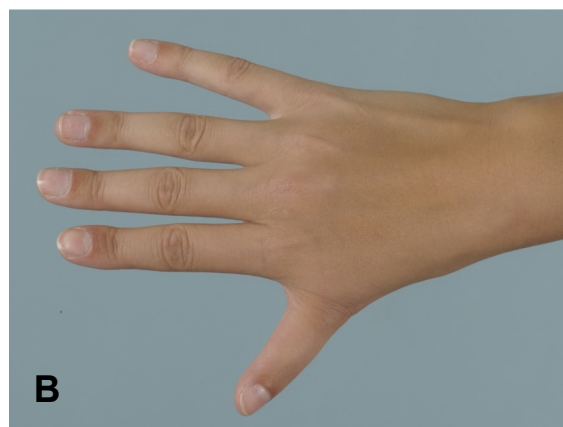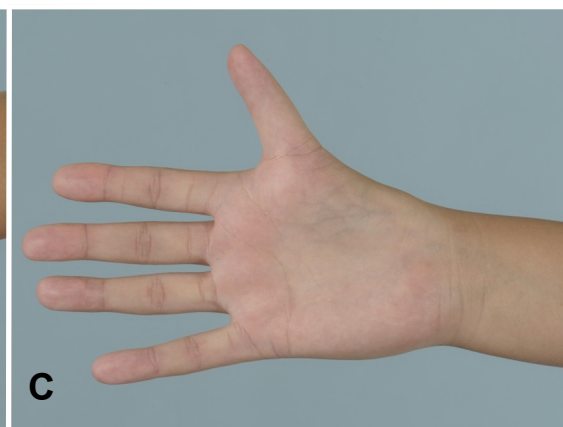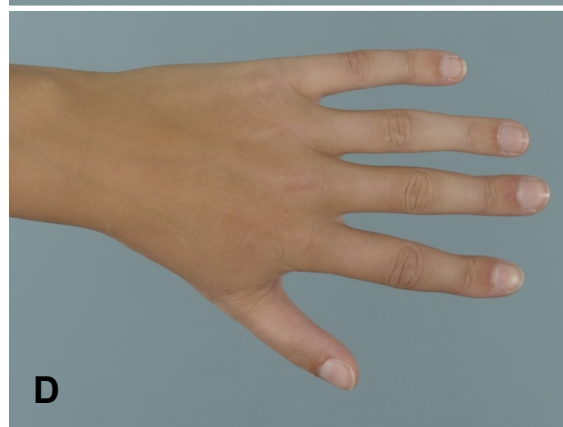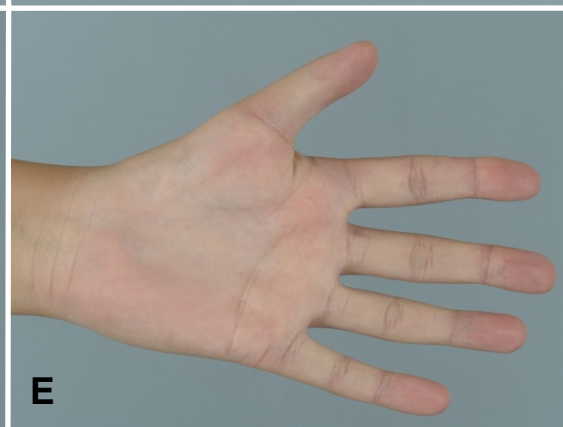

**Figure S2.** Photographs of minor anatomical variation of the ear and underdevelopment of the thumb of subject F3-II-1. A. Ear with localized underdeveloped helix and underdeveloped attached lobe (F3-II-1). B. Hand with underdevelopment of the thumb, proximal placement, right (F3-II-1) C. Hand with underdevelopment thumb and thenar, with decreased palmar creases and absent thenar transverse crease, right (F3-II-1) D. Hand with proximal placement thumb, left (F3-II-1) E. Hand with proximal placement thumb, underdevelopment thenar and shortened proximal transverse crease and absent thenar transverse crease, right (F3-II-1).

|                  |                         |          |                         | upper right |           |           |           |           |           |           |           | upper left |           |           |           |           |           |           |           |             |
|------------------|-------------------------|----------|-------------------------|-------------|-----------|-----------|-----------|-----------|-----------|-----------|-----------|------------|-----------|-----------|-----------|-----------|-----------|-----------|-----------|-------------|
| Patient          | LRP6 Variant            | Gender   | Number of missing teeth | 18          | 17        | 16        | 15        | 14        | 13        | 12        | 11        | 21         | 22        | 23        | 24        | 25        | 26        | 27        | 28        | Taurodontia |
| F1-II, 1         | c.56C>T                 | m        | 6                       | x           |           |           | x         |           |           | x         |           |            | x         |           | x         |           |           |           | x         |             |
| F1-II, 2         | c.56C>T                 | m        | 4                       |             |           |           | x         |           |           | x         |           |            | x         |           |           | x         |           |           |           |             |
| <b>F1-III, 1</b> | <b>c.56C&gt;T</b>       | <b>m</b> | <b>13</b>               | <b>x</b>    |           |           | <b>x</b>  |           | <b>x</b>  | <b>x</b>  |           |            | <b>x</b>  | <b>x</b>  |           | <b>x</b>  |           |           | <b>x</b>  | <b>x</b>    |
| F1-III, 2        | c.56C>T                 | m        | 7                       | x           |           |           | x         |           |           | x         |           |            | x         |           |           |           |           |           | x         | x           |
| F2-I, 1          | Unaffected              | m        | N/A                     |             |           |           |           |           |           |           |           |            |           |           |           |           |           |           |           |             |
| F2-I, 2          | c.1779dupT              | f        | 6                       | x           |           |           |           |           | x         | x         |           |            | x         | x         |           |           |           |           |           |             |
| <b>F2-II, 1</b>  | <b>c.1779dupT</b>       | <b>f</b> | <b>20</b>               | <b>x</b>    | <b>x</b>  |           | <b>x</b>  | <b>x</b>  | <b>x</b>  | <b>x</b>  |           |            | <b>x</b>  | <b>x</b>  | <b>x</b>  | <b>x</b>  |           | <b>x</b>  | <b>x</b>  |             |
| F2-II, 2         | Unaffected              | m        | 0                       |             |           |           |           |           |           |           |           |            |           |           |           |           |           |           |           | x           |
| F3-I, 1          | c.2224_2225dupTT        | m        | 13                      | x           |           |           |           |           | x         | x         |           |            | x         | x         | x         | x         |           |           | x         |             |
| F3-II, 1         | c.2224_2225dupTT        | f        | 16                      | x           | x         |           | x         | x         | x         | x         |           |            | x         | x         |           |           |           |           | x         |             |
| <b>F3-II, 2</b>  | <b>c.2224_2225dupTT</b> | <b>f</b> | <b>20</b>               | <b>x</b>    | <b>x</b>  |           | <b>x</b>  | <b>x</b>  | <b>x</b>  | <b>x</b>  |           |            | <b>x</b>  | <b>x</b>  | <b>x</b>  | <b>x</b>  |           | <b>x</b>  | <b>x</b>  | <b>x</b>    |
| F4-I, 1          | Unaffected              | m        | 0                       |             |           |           |           |           |           |           |           |            |           |           |           |           |           |           |           |             |
| F4-I, 2          | c.1144_1145dupAG        | f        | 0                       |             |           |           |           |           |           |           |           |            |           |           |           |           |           |           |           | x           |
| <b>F4-II, 1</b>  | <b>c.1144_1145dupAG</b> | <b>m</b> | <b>12</b>               | <b>x</b>    |           |           | <b>x</b>  | <b>x</b>  |           | <b>x</b>  | <b>x</b>  |            | <b>x</b>  | <b>x</b>  |           | <b>x</b>  |           | <b>x</b>  |           |             |
| <b>F4-II, 1</b>  | <b>c.1144_1145dupAG</b> | <b>m</b> | <b>12</b>               | <b>x</b>    |           |           | <b>x</b>  | <b>x</b>  |           | <b>x</b>  | <b>x</b>  |            | <b>x</b>  | <b>x</b>  |           | <b>x</b>  |           | <b>x</b>  |           |             |
| F4-I, 2          | c.1144_1145dupAG        | f        | 0                       | x           |           |           |           |           |           |           |           |            |           |           |           |           |           |           |           | x           |
| F4-I, 1          | Unaffected              | m        | 0                       |             |           |           |           |           |           |           |           |            |           |           |           |           |           |           |           |             |
| <b>F3-II, 2</b>  | <b>c.2224_2225dupTT</b> | <b>f</b> | <b>20</b>               | <b>x</b>    | <b>x</b>  |           | <b>x</b>  | <b>x</b>  | <b>x</b>  | <b>x</b>  | <b>x</b>  |            | <b>x</b>  | <b>x</b>  | <b>x</b>  | <b>x</b>  |           | <b>x</b>  | <b>x</b>  | <b>x</b>    |
| F3-II, 1         | c.2224_2225dupTT        | f        | 16                      | x           | x         |           | x         | x         |           | x         |           |            | x         | x         |           | x         |           | x         | x         |             |
| F3-I, 1          | c.2224_2225dupTT        | m        | 13                      | x           |           |           | x         | x         |           | x         | x         |            | x         | x         |           | x         |           |           | x         |             |
| F2-II, 2         | Unaffected              | m        | 0                       |             |           |           |           |           |           |           |           |            |           |           |           |           |           |           |           |             |
| <b>F2-II, 1</b>  | <b>c.1779dupT</b>       | <b>f</b> | <b>20</b>               | <b>x</b>    | <b>x</b>  |           | <b>x</b>  |           | <b>x</b>  | <b>x</b>  | <b>x</b>  |            | <b>x</b>  | <b>x</b>  | <b>x</b>  | <b>x</b>  |           | <b>x</b>  | <b>x</b>  |             |
| F2-I, 2          | c.1779dupT              | f        | 6                       | x           |           |           | x         |           |           |           |           |            |           |           |           | x         |           |           |           | x           |
| F2-I, 1          | Unaffected              | m        | N/A                     |             |           |           |           |           |           |           |           |            |           |           |           |           |           |           |           |             |
| F1-III, 2        | c.56C>T                 | m        | 7                       | x           |           |           | x         |           | x         |           |           |            |           | x         |           | x         |           |           | x         | x           |
| <b>F1-III, 1</b> | <b>c.56C&gt;T</b>       | <b>m</b> | <b>13</b>               | <b>x</b>    | <b>x</b>  |           | <b>x</b>  |           |           |           | <b>x</b>  |            | <b>x</b>  | <b>x</b>  |           | <b>x</b>  |           | <b>x</b>  | <b>x</b>  | <b>x</b>    |
| F1-II, 2         | c.56C>T                 | m        | 4                       |             |           |           |           |           |           |           |           |            |           |           |           |           |           |           |           |             |
| F1-II, 1         | c.56C>T                 | m        | 6                       | x           |           |           | x         |           |           |           |           |            |           |           |           |           |           |           |           | x           |
|                  |                         |          |                         | <b>48</b>   | <b>47</b> | <b>46</b> | <b>45</b> | <b>44</b> | <b>43</b> | <b>42</b> | <b>41</b> | <b>31</b>  | <b>32</b> | <b>33</b> | <b>34</b> | <b>35</b> | <b>36</b> | <b>37</b> | <b>38</b> |             |
|                  |                         |          |                         | lower right |           |           |           |           |           |           |           | lower left |           |           |           |           |           |           |           |             |

**Table S1.** Tooth findings in severe hypodontia index cases (in bold) carrying a *LRP6* variant and information on affected or unaffected family members. The third molars are marked in grey and are not taken into account in the total number of missing teeth.
